# Supplementary material for: Functional changes in mRNA expression and alternative pre-mRNA splicing associated with the effects of nutrition on apoptosis and spermatogenesis in the adult testis
Source: PubMed Central journal article supplement (PMC5223305; doi:10.1186/s12864-016-3385-8), 2017-01-10
Supplement: 12864_2016_3385_MOESM2_ESM.pdf [file 12864_2016_3385_MOESM2_ESM.pdf]

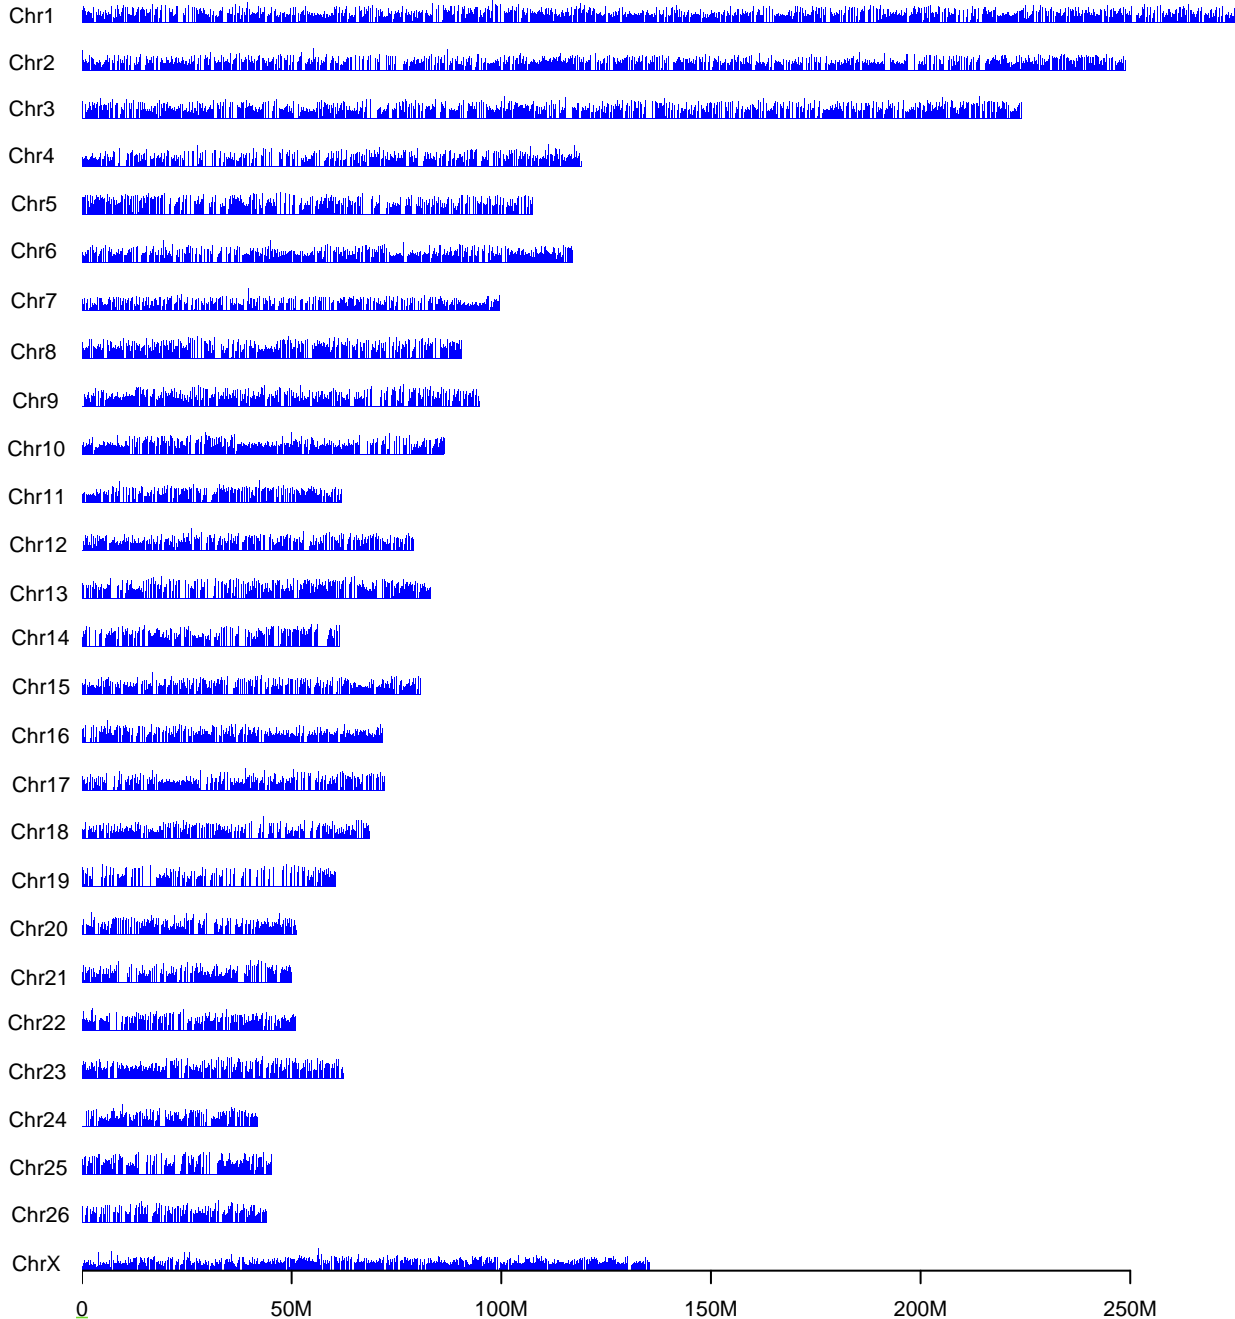

**Figure S1.** Transcription profiles plotted across the sheep genome, showing the distribution of the RNA-seq read density along the length of each chromosome. Each vertical blue line represents  $\log_2$  of the frequency of reads plotted against the chromosome coordinates.
