# Supplementary material for: Functional changes in mRNA expression and alternative pre-mRNA splicing associated with the effects of nutrition on apoptosis and spermatogenesis in the adult testis
Source: PubMed Central journal article supplement (PMC5223305; doi:10.1186/s12864-016-3385-8), 2017-01-10
Supplement: 12864_2016_3385_MOESM5_ESM.pdf [file 12864_2016_3385_MOESM5_ESM.pdf]

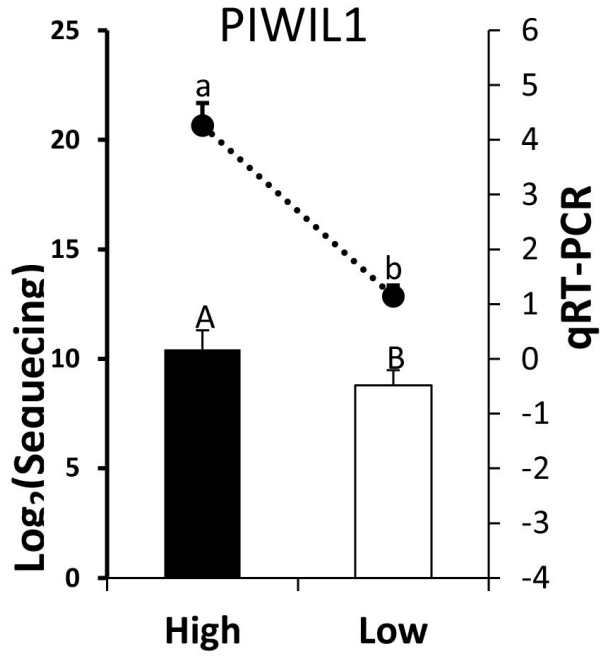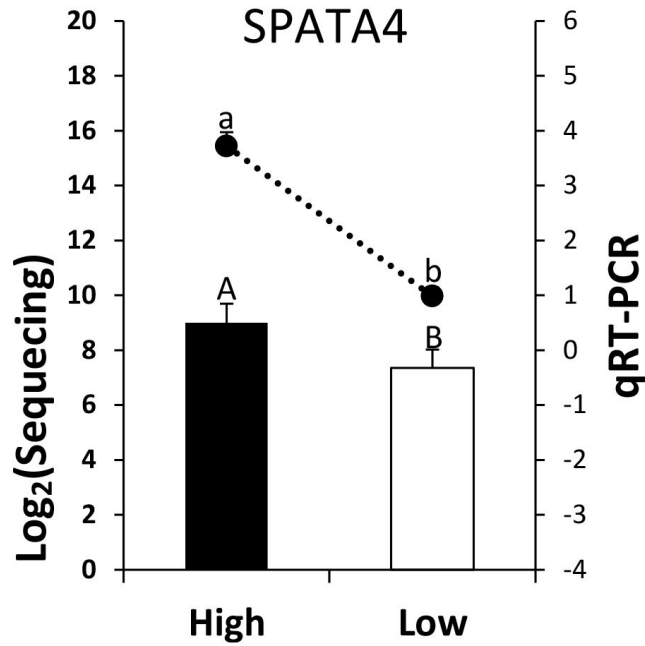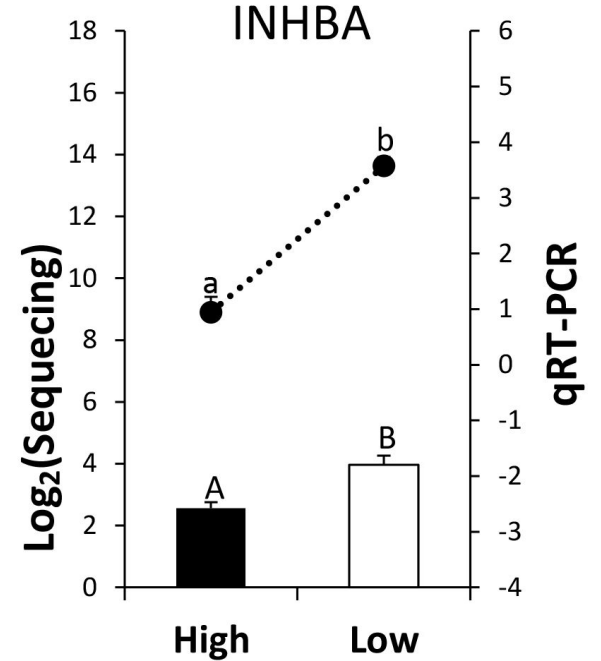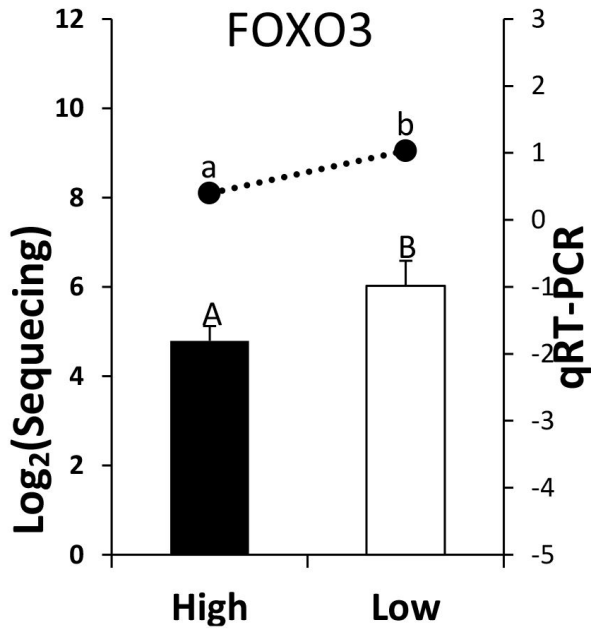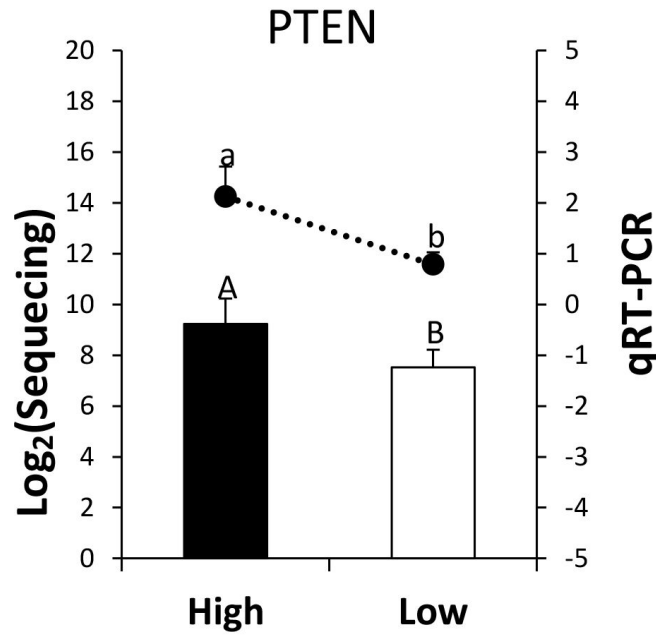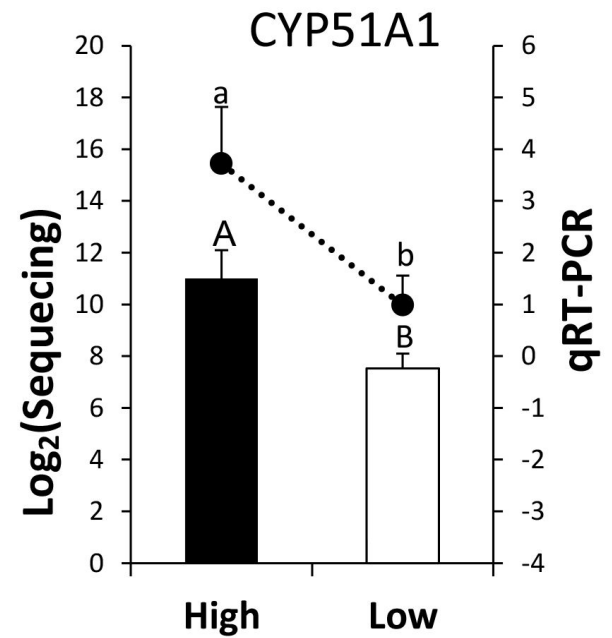

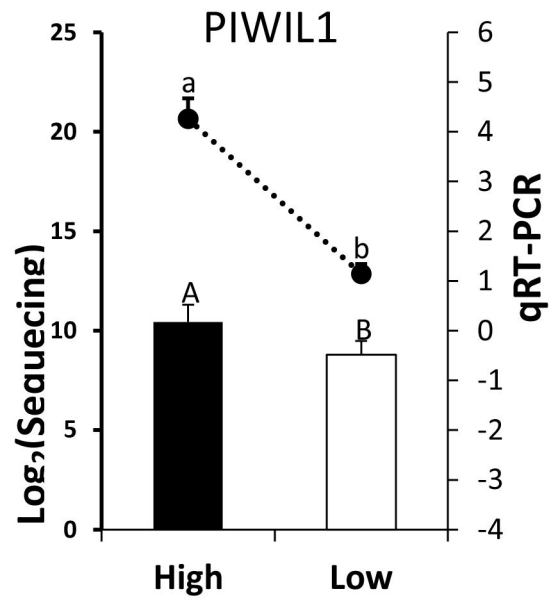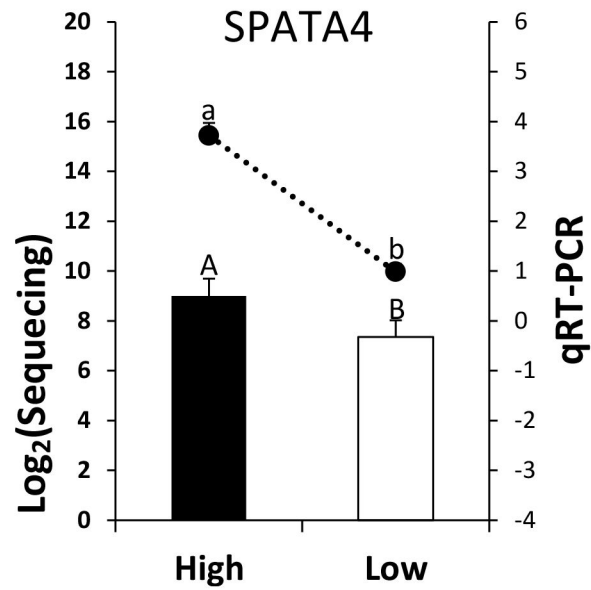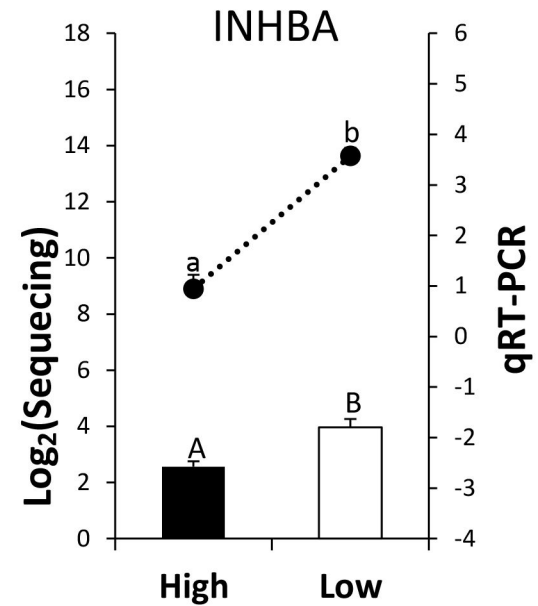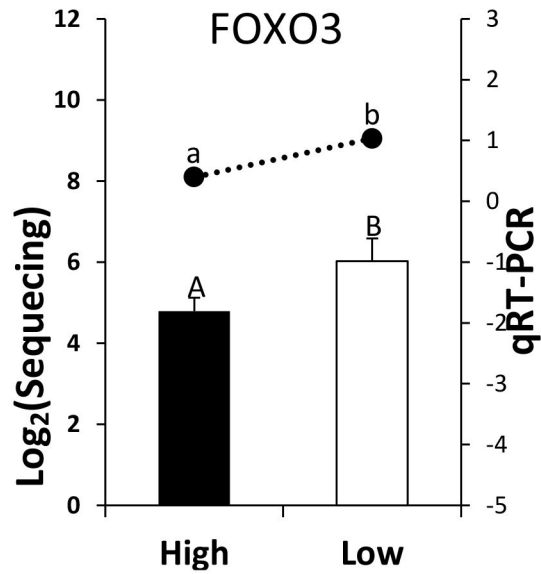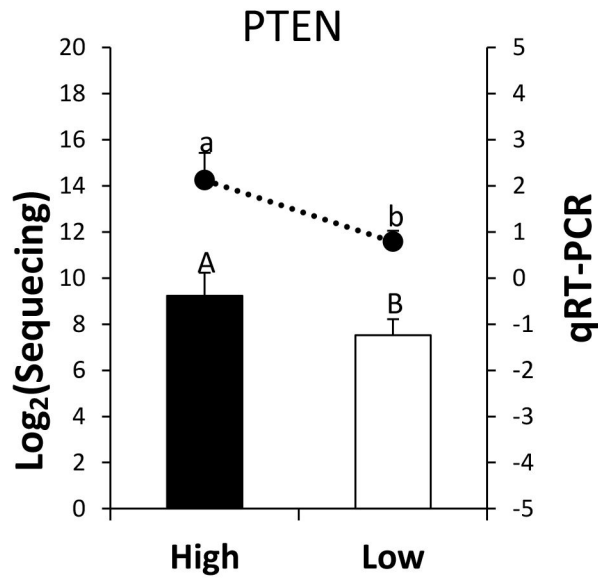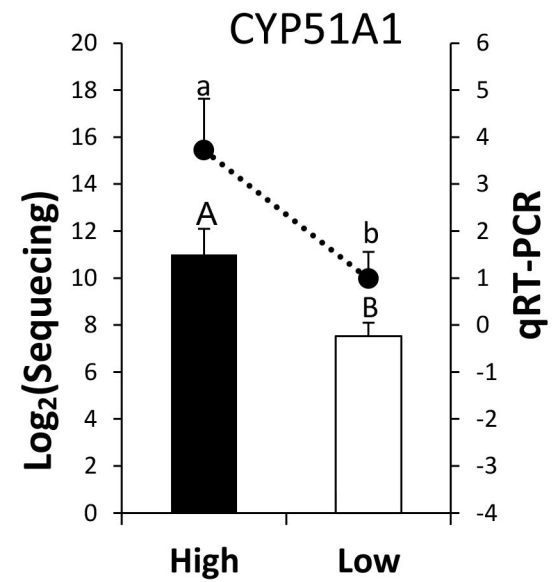

**Figure S2.** qRT-PCR validation of differentially expressed genes. mRNA expressions from qRT-PCR are shown by line graphs on the top and values are shown on the right Y-axis as relative expression ( $2^{-\Delta\Delta Ct}$ ). mRNA expressions from RNA-Seq are shown by bar graphs on the bottom and values are shown on the left Y-axis as  $\log_2$  (normalised reads number). a, b - indicate the significant difference in the relative expression of mRNAs detected via qRT-PCR at  $P < 0.05$ ; A, B - indicate significant difference in the expression of mRNAs detected from RNA-seq at  $FDR < 0.05$ . Data are presented as Mean  $\pm$  Standard deviation.
