# Supplementary material for: Functional changes in mRNA expression and alternative pre-mRNA splicing associated with the effects of nutrition on apoptosis and spermatogenesis in the adult testis
Source: PubMed Central journal article supplement (PMC5223305; doi:10.1186/s12864-016-3385-8), 2017-01-10
Supplement: 12864_2016_3385_MOESM7_ESM.pdf [file 12864_2016_3385_MOESM7_ESM.pdf]

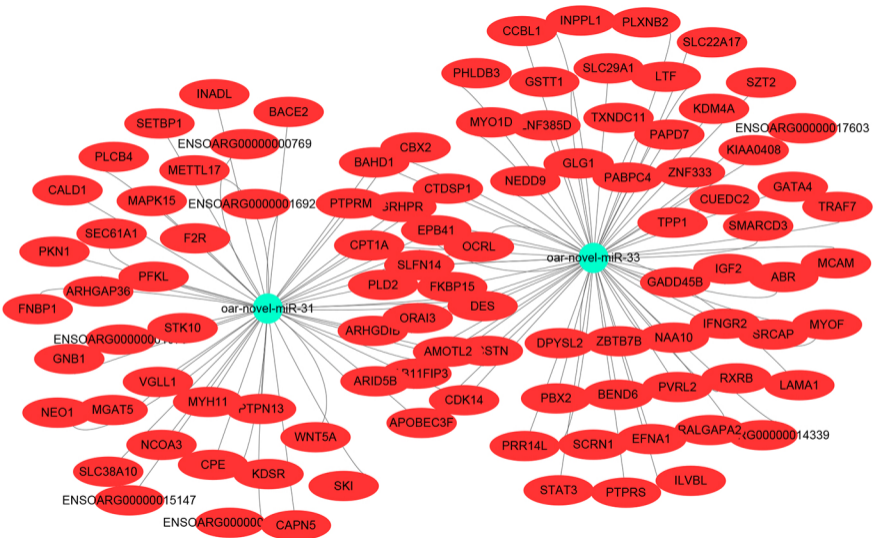

**Figure S3.** Regulatory relationships for two pairs of miRNAs and mRNAs that were differentially expressed in sheep testis following nutritional treatment: oar-novel-miR-33 with 68 mRNAs, and oar-novel-miR-31 with 52 mRNAs.
